# Supplementary material for: Land Use/Cover Change Reduces Elephant Habitat Suitability in the Wami Mbiki–Saadani Wildlife Corridor, Tanzania
Source: MDPI journal article supplement (doi:10.3390/land11020307), 2022-02-17
Supplement: s1 [file s1]

Table SI 1: The mean (%) difference (Tukey Post–Hoc Test) for landscape fragmentation for PLAND among land use.

|             | Bare soil | Bush land | Forest | Grassland | Urban         | Water         |
|-------------|-----------|-----------|--------|-----------|---------------|---------------|
| Agriculture | 0.4       | -0.13     | 0.1    | 0.1       | <b>0.5*</b>   | <b>0.5*</b>   |
| Bare soil   |           | -0.53     | -0.3   | -0.3      | 0.1           | 0.1           |
| Bushland    |           |           | 0.23   | 0.23      | <b>0.63**</b> | <b>0.63**</b> |
| Forest      |           |           |        | 0         | 0.4           | 0.4           |
| Grassland   |           |           |        |           | 0.4           | 0.4           |
| Urban       |           |           |        |           |               | 0             |

Note. Mean difference values with asterisk are statistically significant different at \*  $p < 0.05$ , \*\*  $p < 0.01$

Table SI 2: The mean (%) difference (Tukey Post–Hoc Test) for landscape fragmentation for LPI among land use.

|             | Bare soil | Bush land | Forest           | Grassland      | Urban           | Water           |
|-------------|-----------|-----------|------------------|----------------|-----------------|-----------------|
| Agriculture | 1.73      | -7.67     | <b>-29.43***</b> | -0.4           | 1.73            | 1.73            |
| Bare soil   |           | -9.4      | <b>-31.17**</b>  | -2.13          | 0               | 0               |
| Bushland    |           |           | <b>-21.77*</b>   | 7.27           | 9.4             | 9.4             |
| Forest      |           |           |                  | <b>29.03**</b> | <b>31.17***</b> | <b>31.17***</b> |
| Grassland   |           |           |                  |                | 2.13            | 2.13            |
| Urban       |           |           |                  |                |                 | 0               |

Note. Mean difference values with asterisk are statistically significant different at \*  $p < 0.05$ , \*\*  $p < 0.01$ , \*\*\*  $p < 0.001$

Table SI 3: The mean (Ha) difference (Tukey Post–Hoc Test) for landscape fragmentation for CA among land use.

|             | Bare soil | Bush land         | Forest              | Grassland      | Urban             | Water              |
|-------------|-----------|-------------------|---------------------|----------------|-------------------|--------------------|
| Agriculture | 22516.8   | -36872.3          | <b>-71267***</b>    | -1244          | 23500             | 23116.33           |
| Bare soil   |           | <b>-59389.17*</b> | <b>-93783.83***</b> | -23760.8       | 983.17            | 599.5              |
| Bushland    |           |                   | -34394.67           | 35628.33       | <b>60372.33**</b> | <b>59988.67**</b>  |
| Forest      |           |                   |                     | <b>70023**</b> | <b>94767***</b>   | <b>94383.33***</b> |
| Grassland   |           |                   |                     |                | 24744             | 24360.33           |
| Urban       |           |                   |                     |                |                   | -383.67            |

Note. Mean difference values with asterisk are statistically significant different at \*  $p < 0.05$ , \*\*  $p < 0.01$ , \*\*\*  $p < 0.001$

Table SI 4: The mean (Km<sup>2</sup>) difference (Tukey Post–Hoc Test) for landscape fragmentation for PD among land use.

|             | Bare soil | Bush land | Forest | Grassland | Urban         | Water         |
|-------------|-----------|-----------|--------|-----------|---------------|---------------|
| Agriculture | 0.4       | -0.13     | 0.1    | 0.1       | <b>0.5*</b>   | <b>0.5*</b>   |
| Bare soil   |           | -0.53     | -0.3   | -0.3      | 0.1           | 0.1           |
| Bushland    |           |           | 0.23   | 0.23      | <b>0.63**</b> | <b>0.63**</b> |
| Forest      |           |           |        | 0         | 0.4           | 0.4           |
| Grassland   |           |           |        |           | 0.4           | 0.4           |
| Urban       |           |           |        |           |               | 0             |

Note. Mean difference values with asterisk are statistically significant different at \*  $p < 0.05$ , \*\*  $p < 0.01$

Table SI 5: The mean difference (Tukey Post-Hoc Test) for landscape fragmentation for NP among land use.

|             | Bare soil | Bushland | Forest  | Grassland | Urban  | Water           |
|-------------|-----------|----------|---------|-----------|--------|-----------------|
| Agriculture | 840.5     | -313     | 232.33  | 174.33    | 985    | 928.67          |
| Bare soil   |           | -1153.5  | -608.17 | -666.17   | 144.5  | 88.17           |
| Bushland    |           |          | 545.33  | 487.33    | 1298   | <b>1241.67*</b> |
| Forest      |           |          |         | -58       | 752.67 | 696.33          |
| Grassland   |           |          |         |           | 810.67 | 754.33          |
| Urban       |           |          |         |           |        | -56.33          |

Note. Mean difference values with asterisk are statistically significant different at \*  $p < 0.05$

Table SI 6: The mean (%) difference (Tukey Post-Hoc Test) for landscape fragmentation for IJI among land use.

|             | Bare soil | Bush land | Forest | Grassland | Urban  | Water  |
|-------------|-----------|-----------|--------|-----------|--------|--------|
| Agriculture | -20.35    | 5.23      | 5.6    | -2.77     | -5.37  | -10.13 |
| Bare soil   |           | 25.58     | 25.95  | 17.58     | 14.98  | 10.22  |
| Bushland    |           |           | 0.37   | -8        | -10.6  | -15.37 |
| Forest      |           |           |        | -8.37     | -10.97 | -15.73 |
| Grassland   |           |           |        |           | -2.6   | -7.37  |
| Urban       |           |           |        |           |        | -4.77  |
